# Supplementary material
Source: publisher figshare collection journal article supplement (https://rs.figshare.com/ndownloader/files/17904296)
Supplement: Supplementary file 1 [file 17904296]

require(tidyverse)


# Load data
dat_child=read_csv("data/pink_initial/pink_child_final.csv")
dat_adult_p=read_csv("data/syndata/pink_adult_final.csv")
theme_apa <- function(base_size = 12, base_family = "Arial Unicode MS", box = TRUE, rotate_x = TRUE,...) {
  adapted_theme <- ggplot2::theme_bw(base_size, base_family) +
    ggplot2::theme(
      plot.title = ggplot2::element_text(size = ggplot2::rel(1.1), margin = ggplot2::margin(0, 0, ggplot2::rel(14), 0))
      
      # , axis.title = ggplot2::element_text(size = ggplot2::rel(1.1))
      , axis.title.x = ggplot2::element_text(size = ggplot2::rel(1), lineheight = ggplot2::rel(1.1), margin = ggplot2::margin(ggplot2::rel(6), 0, 0, 0))
      , axis.title.y = ggplot2::element_text(size = ggplot2::rel(1), lineheight = ggplot2::rel(1.1), margin = ggplot2::margin(0, ggplot2::rel(6), 0, 0))
      , axis.ticks.length = ggplot2::unit(ggplot2::rel(6), "points")
      , axis.text = ggplot2::element_text(size = ggplot2::rel(0.9))
      , axis.text.x = ggplot2::element_text(size = ggplot2::rel(1), margin = ggplot2::margin(ggplot2::rel(6), 0, 0, 0))
      , axis.text.y = ggplot2::element_text(size = ggplot2::rel(1), margin = ggplot2::margin(0, ggplot2::rel(6), 0, 0))
      , axis.line.x = ggplot2::element_line()
      , axis.line.y = ggplot2::element_line()
      
      , legend.title = ggplot2::element_text()
      , legend.key = ggplot2::element_rect(fill = NA, color = NA)
      , legend.key.width = ggplot2::unit(ggplot2::rel(15), "points")
      , legend.key.height = ggplot2::unit(ggplot2::rel(15), "points")
      , legend.margin = ggplot2::margin(
        t = ggplot2::rel(16)
        , r = ggplot2::rel(16)
        , b = ggplot2::rel(16)
        , l = ggplot2::rel(16)
        , unit = "points"
      )
      
      , panel.spacing = ggplot2::unit(ggplot2::rel(8), "points")
      , panel.grid.major.x = ggplot2::element_line(size = NA)
      , panel.grid.minor.x = ggplot2::element_line(size = NA)
      , panel.grid.major.y = ggplot2::element_line(size = NA)
      , panel.grid.minor.y = ggplot2::element_line(size = NA)
      
      , strip.background = ggplot2::element_rect(fill = NA, color = NA)
      , strip.text.x = ggplot2::element_text(margin = ggplot2::margin(0, 0, ggplot2::rel(6), 0)) # size = ggplot2::rel(1.1),
      , strip.text.y = ggplot2::element_text(margin = ggplot2::margin(0, 0, 0, ggplot2::rel(6))) # size = ggplot2::rel(1.1),
      , ...
    )
  
  if(box) {
    adapted_theme <- adapted_theme + ggplot2::theme(panel.border = ggplot2::element_rect(color = "black"))
  } else {
    adapted_theme <- adapted_theme + ggplot2::theme(panel.border = ggplot2::element_blank())
  }
  if(rotate_x) {
    adapted_theme <- adapted_theme + ggplot2::theme(axis.text.x=element_text(angle=90,vjust=0.25,hjust=1))
  }
  
  adapted_theme
}

# Experiment 1

# Calculate power for child data
set.seed(42)
dat_adult_p %>%
  mutate(color_bk=as.factor(color_bk)) %>%
  filter(subject_language=="English",is_synesthete==TRUE) %>%
  # Count observations
  group_by(is_pink=factor(color_bk=="Pink",levels=c(T,F),labels=c("Pink","Other")),
           is_first=factor(inducer_is_1i==TRUE,levels=c(T,F),labels=c("First Initial","Not First Initial"))) %>%
  count() %>%  xtabs(n~is_first+is_pink,data=.) %>%
  epitools::riskratio(rev="b",verbose=T) %>%
  with(.,statmod::power.fisher.test(p.outcome[1,2],p.outcome[2,2],17*5,17,nsim=100000))

# Generate Figure 1
dat_child %>% ungroup() %>% 
  group_by(inducer_is_1i,color_simner) %>% count() %>%
  group_by(inducer_is_1i) %>% mutate(p=n/sum(n)) %>%
  mutate(color_simner=factor(color_simner,
                             levels=c("White","Grey","Cyan","LightGreen","DarkGreen","Yellow","Red","DarkBlue","Brown","Purple","Orange","Pink"),
                             labels=c("White","Grey","Cyan","LightGreen","DarkGreen","Yellow","Red","DarkBlue","Sienna","Purple","Orange","Pink"))) %>%
  ungroup() %>% complete(color_simner,inducer_is_1i,fill=list(n=0,p=0)) %>%
  mutate(inducer_is_1i=factor(inducer_is_1i,levels=c(F,T),labels=c("Other\nLetters","First\nInitial"))) %>%
  # Jitter orange - NOT IN ANALYSIS, JUST IN VIS
  mutate(pl=ifelse(color_simner %in% c("Sienna"),p-0.0015,
                   ifelse(color_simner %in% c("Orange"),p+0.0015,p))) %>% 
  mutate(ispink=color_simner=="Pink") %>%
  ggplot()+
  annotate('segment',x=1,xend=2,y=0.025,yend=0,color="black",size=1.5)+
  geom_line(aes(x=inducer_is_1i,y=pl,group=color_simner,color=color_simner),size=1)+
  geom_point(aes(x=inducer_is_1i,y=p,fill=color_simner,shape=ispink),
             color="black",size=2)+
  #scale_color_manual(values=BerlinKay_Hex,guide=FALSE)+
  #scale_fill_manual(values=BerlinKay_Hex,guide=FALSE)+
  scale_color_identity()+
  scale_fill_identity()+
  scale_x_discrete(expand=c(0,0.1))+
  theme_apa(box=F,rotate_x=F,base_family="Arial Unicode MS",base_size=12)+
  theme(axis.line=element_blank())+
  labs(x="",y="Proportion of Associations")+
  annotate("segment", x=-Inf, xend=Inf, y=-Inf, yend=-Inf)+
  annotate("segment", x=-Inf, xend=-Inf, y=-Inf, yend=Inf)+
  scale_shape_manual(values=c("TRUE"=24,"FALSE"=21),guide=F)
#ggsave("analysis/pink_initial/RootFig1.png",width=4,height=4,units="in",dpi=300)

# Calculate statistic and effect size
set.seed(42)
dat_child %>%
  mutate(color_bk=as.factor(color_bk)) %>%
  # Count observations
  group_by(is_pink=factor(color_bk=="Pink",levels=c(T,F),labels=c("Pink","Other")),
           is_first=factor(inducer_is_1i==TRUE,levels=c(T,F),labels=c("First Initial","Not First Initial"))) %>%
  count() %>% xtabs(n~is_first+is_pink,data=.) %>%
  epitools::riskratio(rev="b",method="boot",replicates=100000)

# We might worry that  trends (B=blue/brown, etc.) observed in adults are inflating effect size of pink
# For that to happen, the trends must exist in the child data
# Is B blue/brown? No
dat_child %>%
  mutate(is_b=inducer=="B",
         is_expected=color_simner %in% c("DarkBlue","Cyan","Brown")) %>%
  group_by(is_b,is_expected) %>% count() %>%
  xtabs(n~is_b+is_expected,data=.) %>%
  epitools::riskratio(verbose=T)
# Is "R" red? No
dat_child %>%
  mutate(is_r=inducer=="R",
         is_expected=color_simner %in% c("Red")) %>%
  group_by(is_r,is_expected) %>% count() %>%
  xtabs(n~is_r+is_expected,data=.) %>%
  epitools::riskratio(verbose=T)
# Is "Y" yellow? No
dat_child %>%
  mutate(is_y=inducer=="Y",
         is_expected=color_simner %in% c("Yellow")) %>%
  group_by(is_y,is_expected) %>% count() %>%
  xtabs(n~is_y+is_expected,data=.) %>%
  epitools::riskratio(verbose=T)


# Experiment 2

# Power analyses

# Dutch Syns
set.seed(42)
dat_adult_p %>%
  mutate(color_bk=as.factor(color_bk)) %>%
  filter(subject_language=="English",is_synesthete==TRUE) %>%
  # Count observations
  group_by(is_pink=factor(color_bk=="Pink",levels=c(T,F),labels=c("Pink","Other")),
           is_first=factor(inducer_is_1i==TRUE,levels=c(T,F),labels=c("First Initial","Not First Initial"))) %>%
  count() %>%  xtabs(n~is_first+is_pink,data=.) %>%
  epitools::riskratio(rev="b",verbose=T) %>%
  {
    statmod::power.fisher.test(p1=.$p.outcome[1,2],p2=.$p.outcome[2,2],
                               n1=as.numeric(count(ungroup(filter(dat_adult_p,subject_language=="Dutch",is_synesthete==TRUE,inducer_is_1i==FALSE)))),
                               n2=as.numeric(count(ungroup(filter(dat_adult_p,subject_language=="Dutch",is_synesthete==TRUE,inducer_is_1i==TRUE)))),
                               nsim=100000)
  }

# Dutch Non-Syns
set.seed(42)
dat_adult_p %>%
  mutate(color_bk=as.factor(color_bk)) %>%
  filter(subject_language=="English",is_synesthete==TRUE) %>%
  # Count observations
  group_by(is_pink=factor(color_bk=="Pink",levels=c(T,F),labels=c("Pink","Other")),
           is_first=factor(inducer_is_1i==TRUE,levels=c(T,F),labels=c("First Initial","Not First Initial"))) %>%
  count() %>%  xtabs(n~is_first+is_pink,data=.) %>%
  epitools::riskratio(rev="b",verbose=T) %>%
  {
    statmod::power.fisher.test(p1=.$p.outcome[1,2],p2=.$p.outcome[2,2],
                               n1=as.numeric(count(ungroup(filter(dat_adult_p,subject_language=="Dutch",is_synesthete==FALSE,inducer_is_1i==FALSE)))),
                               n2=as.numeric(count(ungroup(filter(dat_adult_p,subject_language=="Dutch",is_synesthete==FALSE,inducer_is_1i==TRUE)))),
                               nsim=100000)
  }

# English Non-Syns
set.seed(42)
dat_adult_p %>%
  mutate(color_bk=as.factor(color_bk)) %>%
  filter(subject_language=="English",is_synesthete==TRUE) %>%
  # Count observations
  group_by(is_pink=factor(color_bk=="Pink",levels=c(T,F),labels=c("Pink","Other")),
           is_first=factor(inducer_is_1i==TRUE,levels=c(T,F),labels=c("First Initial","Not First Initial"))) %>%
  count() %>%  xtabs(n~is_first+is_pink,data=.) %>%
  epitools::riskratio(rev="b",verbose=T) %>%
  {
    statmod::power.fisher.test(p1=.$p.outcome[1,2],p2=.$p.outcome[2,2],
                               n1=as.numeric(count(ungroup(filter(dat_adult_p,subject_language=="English",is_synesthete==FALSE,inducer_is_1i==FALSE)))),
                               n2=as.numeric(count(ungroup(filter(dat_adult_p,subject_language=="English",is_synesthete==FALSE,inducer_is_1i==TRUE)))),
                               nsim=100000)
  }

# Language X Synesthesia stats
dat_adult_p %>%
  mutate(color_bk=as.factor(color_bk)) %>%
  # Count observations
  group_by(subject_language,
           is_synesthete,
           is_pink=factor(color_bk=="Pink",levels=c(T,F),labels=c("Pink","Other")),
           is_first=factor(inducer_is_1i==TRUE,levels=c(T,F),labels=c("First Initial","Not First Initial"))) %>%
  count() %>% 
  group_by(is_synesthete,subject_language) %>% nest() %>%
  mutate(epi=map(data,~xtabs(n~is_first+is_pink,data=.x) %>%
                   epitools::riskratio(rev="b",method="boot",replicates=1000000))) %>%
  mutate(chisq=map_dbl(data,~xtabs(n~is_first+is_pink,data=.x) %>%
                         chisq.test() %>% .$statistic)) %>%
  mutate(test=map(epi,~as.data.frame(.x$p.value)[2,])) %>%
  mutate(es=map(epi,~as.data.frame(.x$measure)[2,])) %>%
  select(-data,-epi) %>%
  unnest()

# Stats (Languages merged)
dat_adult_p %>%
  mutate(color_bk=as.factor(color_bk)) %>%
  # Count observations
  group_by(is_synesthete,
           is_pink=factor(color_bk=="Pink",levels=c(T,F),labels=c("Pink","Other")),
           is_first=factor(inducer_is_1i==TRUE,levels=c(T,F),labels=c("First Initial","Not First Initial"))) %>%
  count() %>% group_by(is_synesthete) %>% nest() %>%
  mutate(epi=map(data,~xtabs(n~is_first+is_pink,data=.x) %>%
                   epitools::riskratio(rev="b",method="boot",replicates=1000000))) %>%
  mutate(chisq=map_dbl(data,~xtabs(n~is_first+is_pink,data=.x) %>%
                         chisq.test() %>% .$statistic)) %>%
  mutate(test=map(epi,~as.data.frame(.x$p.value)[2,])) %>%
  mutate(es=map(epi,~as.data.frame(.x$measure)[2,])) %>%
  select(-data,-epi) %>%
  unnest()

# Non-syn is trending in English/Combined. Make sure that syn is actually stronger effect.
# This means test for syn/non-syn interaction
dat_adult_p %>%
  mutate(color_bk=as.factor(color_bk)) %>%
  mutate(is_pink=factor(color_bk=="Pink",levels=c(T,F),labels=c("Pink","Other")),
         is_first=factor(inducer_is_1i==TRUE,levels=c(T,F),labels=c("First Initial","Not First Initial"))) %>%
  mutate(battery_id=as.factor(battery_id)) %>%
  lme4::glmer(is_pink~is_first*is_synesthete+(1|battery_id),data=.,family="binomial") %>% 
  summary()

# Generate Figure 2
dat_adult_p %>%
  mutate(color_bk=as.factor(color_bk)) %>%
  # Count observations
  group_by(is_pink=factor(color_bk=="Pink",levels=c(F,T),labels=c("Not Pink","Pink")),
           is_first=factor(inducer_is_1i==TRUE,levels=c(F,T),labels=c("Not First\nInitial","First\nInitial")),
           is_synesthete=factor(is_synesthete,levels=c(T,F),
                                labels=c("Synesthetic Adults (Exp. 2)","Non-Synesthetic Adults (Exp. 2)")),
           subject_language=factor(subject_language,levels=c("English","Dutch"))) %>%
  count() %>%
  group_by(is_first,is_synesthete,subject_language) %>% 
  mutate(p=n/sum(n)) %>% ungroup() %>%
  filter(is_pink=="Pink") %>% select(-is_pink) %>%
  bind_rows(dat_child %>%
              mutate(color_bk=as.factor(color_bk)) %>%
              # Count observations
              group_by(is_pink=factor(color_bk=="Pink",levels=c(T,F),labels=c("Pink","Other")),
                       is_first=factor(inducer_is_1i==TRUE,levels=c(F,T),labels=c("Not First\nInitial","First\nInitial"))) %>%
              count() %>%
              group_by(is_first) %>% mutate(p=n/sum(n)) %>%
              ungroup() %>% mutate(subject_language="English",is_synesthete="Non-Synesthetic\nChildren (Exp. 1)") %>%
              filter(is_pink=="Pink")) %>%
  bind_rows(dat_adult_p %>%
              # Count observations
              filter(!is.na(subject_favcolor),is_synesthete==F) %>% ungroup() %>%
              group_by(is_fav=factor(subject_favcolor==color_bk,levels=c(T,F),labels=c("Favorite","Other")),
                       is_first=factor(inducer_is_1i==TRUE,levels=c(F,T),
                                       labels=c("Not First\nInitial","First\nInitial"))) %>% count()%>%
              group_by(is_first) %>% mutate(p=n/sum(n)) %>%
              ungroup() %>% mutate(subject_language="English",
                                   is_synesthete="Non-Synesthetic Adults\n(Exp. 3 - y axis is favorite)") %>%
              filter(is_fav=="Favorite")) %>%
  ungroup() %>% mutate(is_synesthete=as.factor(is_synesthete)) %>%
  mutate(is_synesthete=factor(is_synesthete,
                              levels=rev(levels(is_synesthete)))) %>%
  ungroup() %>% mutate(subject_language=factor(subject_language,levels=c("English","Dutch"))) %>%
  #filter(subject_language=="English") %>%
  mutate(is_synesthete=factor(is_synesthete,
                              levels=c("Synesthetic Adults (Exp. 2)",
                                       "Non-Synesthetic Adults (Exp. 2)",
                                       "Non-Synesthetic\nChildren (Exp. 1)",
                                       "Non-Synesthetic Adults\n(Exp. 3 - y axis is favorite)"))) %>%
  filter(!is_synesthete=="Non-Synesthetic Adults\n(Exp. 3 - y axis is favorite)") %>%
  ggplot(aes(x=is_first,y=p))+
  facet_wrap(~subject_language)+
  geom_line(aes(color=is_synesthete,group=is_synesthete,linetype=is_synesthete),size=1)+
  geom_point(size=2,aes(fill=is_synesthete,shape=is_synesthete),color="black")+
  geom_hline(yintercept=0,alpha=0)+
  labs(x="",y="P (Letter is Pink)",color="",linetype="")+
  theme_apa(box=F,rotate_x=F,base_family="Arial Unicode MS",base_size=12)+
  theme(axis.line=element_blank(),legend.key.width = unit(2, "line"))+
  scale_shape_manual("",values=c("Non-Synesthetic\nChildren (Exp. 1)"=24,
                                 "Non-Synesthetic Adults (Exp. 2)"=22,
                                 "Synesthetic Adults (Exp. 2)"=21))+
  scale_color_manual("",values=c("Non-Synesthetic\nChildren (Exp. 1)"="gray60",
                                 "Non-Synesthetic Adults (Exp. 2)"="gray60",
                                 "Synesthetic Adults (Exp. 2)"="black"))+
  scale_fill_manual("",values=c("Non-Synesthetic\nChildren (Exp. 1)"="gray60",
                                "Non-Synesthetic Adults (Exp. 2)"="gray60",
                                "Synesthetic Adults (Exp. 2)"="black"))+
  scale_linetype_manual("",values=c("Non-Synesthetic\nChildren (Exp. 1)"=2,
                                    "Non-Synesthetic Adults (Exp. 2)"=1,
                                    "Synesthetic Adults (Exp. 2)"=1))+
  labs(x="",y="P(Letter is Pink)")+
  annotate("segment", x=-Inf, xend=Inf, y=-Inf, yend=-Inf)+
  annotate("segment", x=-Inf, xend=-Inf, y=-Inf, yend=Inf)
ggsave("analysis/pink_initial/RootFig2.png",width=6,height=4,units="in",dpi=300)


# Non-syn "A" is red
dat_adult_p %>%
  filter(is_synesthete==F) %>%
  # Count observations
  group_by(subject_language,
           is_red=factor(color_bk=="Red",levels=c(T,F),labels=c("Red","OtherColor")),
           is_a=factor(inducer_is_A,levels=c(T,F),labels=c("A","OtherGrapheme"))) %>%
  count() %>% group_by(subject_language) %>% nest() %>%
  mutate(data=map(data,~xtabs(n~is_a+is_red,data=.x))) %>%
  mutate(stat=map(data,~broom::tidy(fisher.test(.x)))) %>%
  unnest(stat)

# Experiment 3

# Favorite color is no longer pink
dat_adult_p %>%
  # Count observations
  filter(!is.na(subject_favcolor),is_synesthete==F,inducer_is_1i) %>% ungroup() %>%
  summarize(n=n(),n_1i=sum(subject_favcolor=="Pink")) %>%
  {with(.,binom.test(n_1i,n,p=1/11,alternative="greater"))}

# Non-syn favorite color is first initial
dat_adult_p %>%
  # Count observations
  filter(!is.na(subject_favcolor),is_synesthete==F) %>% ungroup() %>%
  group_by(inducer_is_1i,is_fav=subject_favcolor==color_bk) %>% count() %>%
  xtabs(n~is_fav+inducer_is_1i,data=.) %>%
  epitools::riskratio(verbose=T)

# Generate Figure 3
dat_adult_p %>%
  mutate(color_bk=as.factor(color_bk)) %>%
  # Count observations
  group_by(is_pink=factor(color_bk=="Pink",levels=c(F,T),labels=c("Not Pink","Pink")),
           is_first=factor(inducer_is_1i==TRUE,levels=c(F,T),labels=c("Not First\nInitial","First\nInitial")),
           is_synesthete=factor(is_synesthete,levels=c(T,F),
                                labels=c("S2","NS2")),
           subject_language=factor(subject_language,levels=c("English","Dutch"))) %>%
  count() %>%
  group_by(is_first,is_synesthete,subject_language) %>% 
  mutate(p=n/sum(n)) %>%
  filter(is_pink=="Pink") %>% ungroup() %>%
  bind_rows(dat_adult_p %>%
              # Count observations
              filter(!is.na(subject_favcolor),is_synesthete==F) %>% ungroup() %>%
              group_by(is_fav=factor(subject_favcolor==color_bk,levels=c(T,F),labels=c("Favorite","Other")),
                       is_first=factor(inducer_is_1i==TRUE,levels=c(F,T),
                                       labels=c("Not First\nInitial","First\nInitial"))) %>% count()%>%
              group_by(is_first) %>% mutate(p=n/sum(n)) %>%
              ungroup() %>% mutate(subject_language="English",
                                   is_synesthete="NS3") %>%
              filter(is_fav=="Favorite")) %>%
  ungroup() %>% mutate(is_synesthete=as.factor(is_synesthete)) %>%
  mutate(is_synesthete=factor(is_synesthete,
                              levels=rev(levels(is_synesthete)))) %>%
  ungroup() %>% mutate(subject_language=factor(subject_language,levels=c("English","Dutch"))) %>%
  filter(subject_language=="English",!is_synesthete=="NS1") %>%
  mutate(is_synesthete=factor(is_synesthete,
                              levels=c("NS3","NS2","S2"),
                              labels=c("Non-Synesthetic Adults\n(Exp. 3 - Favorite Color)",
                                       "Non-Synesthetic Adults\n(Exp. 2 - Pink)",
                                       "Synesthetic Adults\n(Exp. 2 - Pink)"))) %>%
  ggplot(aes(x=is_first,y=p))+
  geom_line(aes(color=is_synesthete,group=is_synesthete,linetype=is_synesthete),size=1)+
  geom_point(size=2,aes(fill=is_synesthete,shape=is_synesthete),color="black")+
  geom_hline(yintercept=0,alpha=0)+
  labs(x="",y="P (Letter is Pink)",color="",linetype="")+
  theme_apa(box=F,rotate_x=F,base_family="Arial Unicode MS",base_size=12)+
  theme(axis.line=element_blank(),legend.key.width = unit(2, "line"))+
  scale_color_manual("",values=c("Synesthetic Adults\n(Exp. 2 - Pink)"="pink",
                                 "Non-Synesthetic Adults\n(Exp. 2 - Pink)"="pink",
                                 "Non-Synesthetic Adults\n(Exp. 3 - Favorite Color)"="black"))+
  scale_fill_manual("",values=c("Synesthetic Adults\n(Exp. 2 - Pink)"="pink",
                                "Non-Synesthetic Adults\n(Exp. 2 - Pink)"="pink",
                                "Non-Synesthetic Adults\n(Exp. 3 - Favorite Color)"="black"))+
  scale_linetype_manual("",values=c("Non-Synesthetic Adults\n(Exp. 2 - Pink)"=1,
                                    "Synesthetic Adults\n(Exp. 2 - Pink)"=2,
                                    "Non-Synesthetic Adults\n(Exp. 3 - Favorite Color)"=1))+
  scale_shape_manual("",values=c("Non-Synesthetic Adults\n(Exp. 2 - Pink)"=22,
                                    "Synesthetic Adults\n(Exp. 2 - Pink)"=21,
                                    "Non-Synesthetic Adults\n(Exp. 3 - Favorite Color)"=24))+
  labs(x="",y="Proportion of Associations")+
  annotate("segment", x=-Inf, xend=Inf, y=-Inf, yend=-Inf)+
  annotate("segment", x=-Inf, xend=-Inf, y=-Inf, yend=Inf)
#ggsave("analysis/pink_initial/RootFig3.png",width=5,height=4,units="in",dpi=300)
